# Supplementary material for: Association between PPARG genetic polymorphisms and ischemic stroke risk in a northern Chinese Han population: a case-control study
Source: PubMed Central journal article supplement — Neural Regen Res. 2019 Nov;14(11):1986–93. doi: 10.4103/1673-5374.259621 (PMC6676861; doi:10.4103/1673-5374.259621), 2019-11

## 中国医科大学附属第一医院医学科学研究伦理委员会

## 批准函

科伦审[2012]38号

|                                                                        |                                             |       |            |      |      |
|------------------------------------------------------------------------|---------------------------------------------|-------|------------|------|------|
| 项目名称                                                                   | 脑出血患者外周血及出血灶周围脑组织特异性 microRNA 表达谱及其脑水肿机制的研究 |       |            |      |      |
| 项目来源                                                                   | 国家自然科学基金委                                   |       |            |      |      |
| CRO                                                                    | ——                                          |       |            |      |      |
| 承担科室                                                                   | 神经内科                                        | 项目负责人 | 何志义        | 申请状态 | 项目申报 |
| 审查文件(含版本号)如下:                                                          |                                             |       |            |      |      |
| <input type="checkbox"/> 申请书<br><input type="checkbox"/> 知情同意书 版本: 1.0 |                                             |       |            |      |      |
| 出席会议人数: 8 人                                                            |                                             |       | 弃权或回避: 1 人 |      |      |
| 同意                                                                     | 修正后同意                                       | 修正后重审 | 不同意        |      |      |
| 0 票                                                                    | 0 票                                         | 7 票   | 0 票        |      |      |

1. 伦理委员会对项目的审查决定如下(在□内划×)

 同意       修正后同意       修正后重审       不同意

2. 经伦理委员会的审查, 具体的意见和建议:

① 补充“健康人群知情同意书”。

② 研究方案中补充“对照组人群的入选标准、排除标准”。

③ 研究方案中“每个受试者采集 2-3ml 静脉血”与知情同意书中“常规检查后的剩余血清”相矛盾。

3. 按照伦理委员会的建议和意见修改后, 提交伦理委员会进行会议审查。

主任(副主任)委员签名:

伦理委员会公章:

日期: 2012. 2. 20

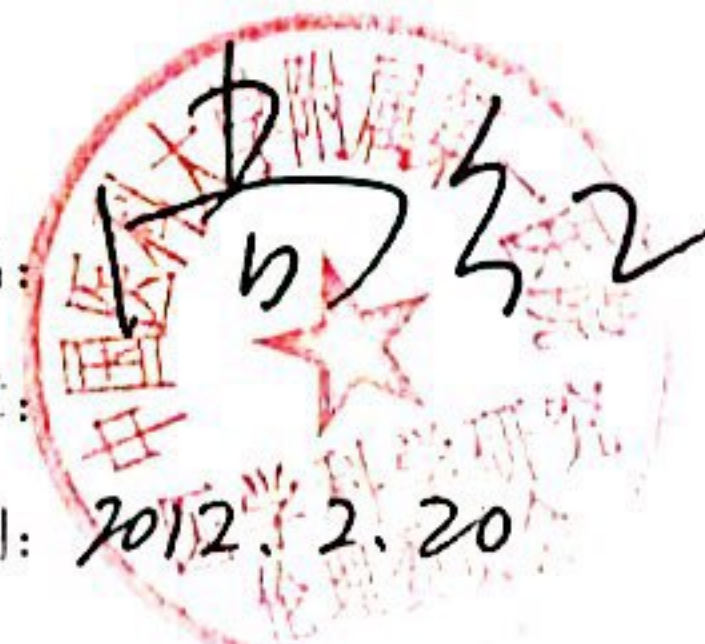

Supplement: NRR-14-1986_Suppl1.pdf [file NRR-14-1986_Suppl1.pdf]
