# Supplementary material for: Association between PPARG genetic polymorphisms and ischemic stroke risk in a northern Chinese Han population: a case-control study
Source: PubMed Central journal article supplement — Neural Regen Res. 2019 Nov;14(11):1986–93. doi: 10.4103/1673-5374.259621 (PMC6676861; doi:10.4103/1673-5374.259621), 2019-11
Supplement: NRR-14-1986_Suppl2.pdf [file NRR-14-1986_Suppl2.pdf]

## OPEN PEER REVIEW REPORT 1

**Reviewer 1:** Sagar Gaikwad, Senior Research Fellow, Indian Institute of Advanced Research, India.

**Comments to authors:**

In this manuscript "Association between PPAR $\gamma$  genetic polymorphisms and ischemic stroke risk in a Northern Chinese Han population" the authors have investigated the association between two genetic polymorphisms of PPAR $\gamma$  with ischemic stroke risk in 895 ischemic stroke patients and 883 case controls from Northern Chinese population. The authors shown that two PPAR $\gamma$  genetic variants, rs1801282 and rs3856806, play an important role in the etiology of ischemic stroke. Further, the study also revealed a synergistic SNP-SNP interaction between the two risk alleles. This study suggests that the rs1801282 CG genotype and rs3856806 CT/TT genotypes in PPAR $\gamma$  are significantly associated with increased ischemic stroke risk in Chinese population.

The study is scientifically sound and represents a valuable contribution to the literature. Overall, this is well performed study, with proper methods for a purpose; most results are convincing and support the author's conclusion.

- The authors should comment and discuss the role of PPAR $\gamma$  in the discussion section (Zhao et al., 2009 J Neurosci; Culman et al., 2007 Trends Pharmacol Sci; Certo et al., 2015 Pharmacol Res, etc.).
- This reviewer strongly suggest that the authors include brief description about the SNP-SNP interaction for reader's better understanding.
