# Supplementary material for: Association between PPARG genetic polymorphisms and ischemic stroke risk in a northern Chinese Han population: a case-control study
Source: PubMed Central journal article supplement — Neural Regen Res. 2019 Nov;14(11):1986–93. doi: 10.4103/1673-5374.259621 (PMC6676861; doi:10.4103/1673-5374.259621), 2019-11
Supplement: NRR-14-1986_Suppl3.pdf [file NRR-14-1986_Suppl3.pdf]

## OPEN PEER REVIEW REPORT 2

**Reviewer 2:** Mercedes Fernandez, University of Bologna, Bologna, Italy.

**Comments to authors:**

In the present manuscript, authors describe a study which identifies two common PPARg gene polymorphisms associated with ischemic stroke.

This study seems to be related to a study already published (by Wang et al., 2015) in which comparing not only Norhern Chinese Han polulation but other populations as Caucasian, Asian..., not significant relationship was found between PPARg gene polymorphisms and artherosclerotic disease.

In the present study, considering only Norhern Chinese Han polulation, authors have found a potential relationship between two common PPARg gene polymorphisms and ischemic stroke.

In the discussion authors state what is missing/limitations in the study that is sample size, large-scale investigations, functional in vitro and in vivo experiments, in order to go in depth in this matter and to better understand the role of these polymorphisms in the etiology of ischemic stroke. So, this study is another piece of the puzzle that needs to be completed.



NRR-14-1986\_Suppl2
